# Supplementary material for: The impact of the time factors on the exercise-based cardiac rehabilitation outcomes of the patients with acute myocardial infarction after percutaneous coronary intervention: a systematic review and meta-analysis
Source: Springer Nature journal article supplement (doi:10.1186/s12872-023-03692-z), 2024-01-06
Supplement: MOESM2 [file 26603202]

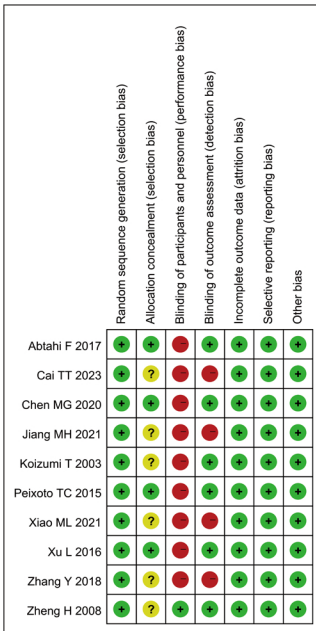

(a) Risk of bias summary (RCT)

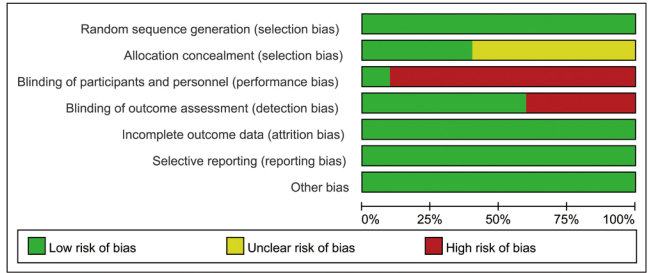

(b) Risk of bias graph (RCT)

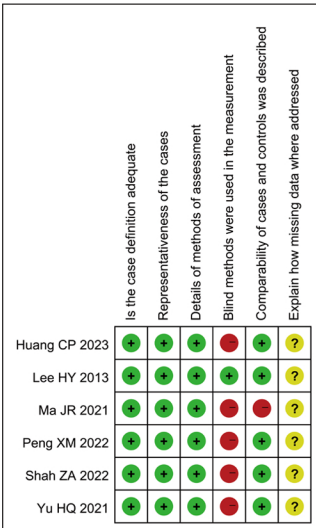

(c) Risk of bias summary (Observational Study)

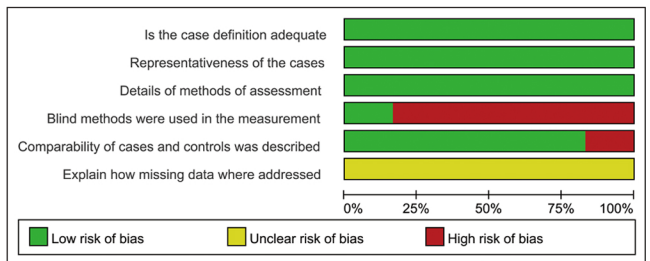

(d) Risk of bias graph (Observational Study)
