# Supplementary material for: The impact of the time factors on the exercise-based cardiac rehabilitation outcomes of the patients with acute myocardial infarction after percutaneous coronary intervention: a systematic review and meta-analysis
Source: Springer Nature journal article supplement (doi:10.1186/s12872-023-03692-z), 2024-01-06

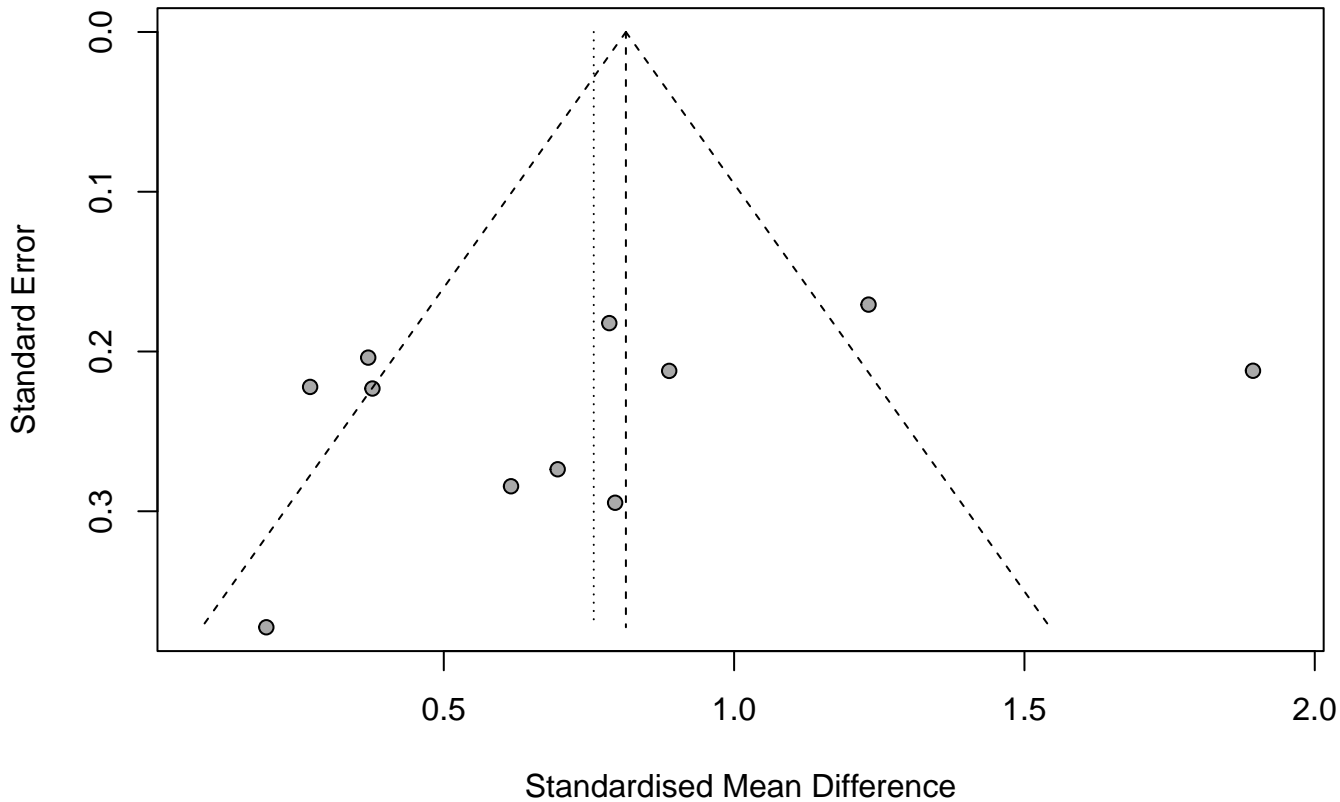

Supplement: MOESM4 [file 26603202]
